# Supplementary material for: Reactive oxygen species induced by plant essential oil for effective degradation of p-phenylenediamine
Source: Royal Society of Chemistry journal article supplement (doi:10.1039/d3gc00707c), 2023-01-01
Supplement: d3gc00707c2.pdf [file d3gc00707c2.pdf]

## Supporting Figures

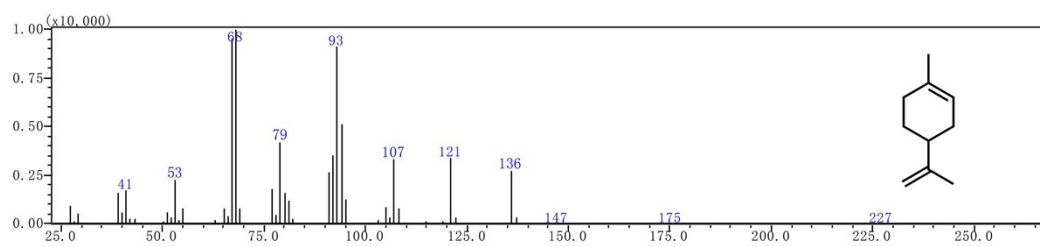

**Fig. S1** Mass spectrum (EI) of limonene

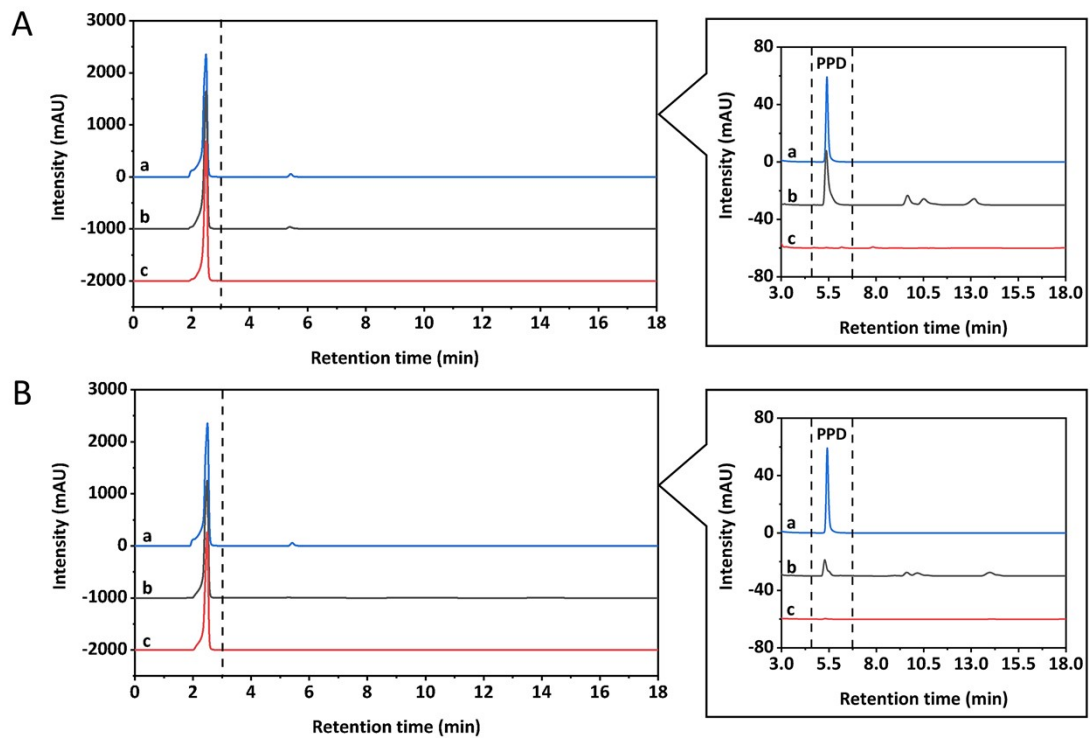

**Fig. S2** A: The overall HPLC chromatograms of PPD standard (a), hair dye sewage sample (b), hair dye sewage sample treated with BC/SE-OPEO (c); B: The overall HPLC chromatograms of PPD standard (a), dyed hair extraction sample (b), dyed hair sample treated with BC/SE-OPEO (c).

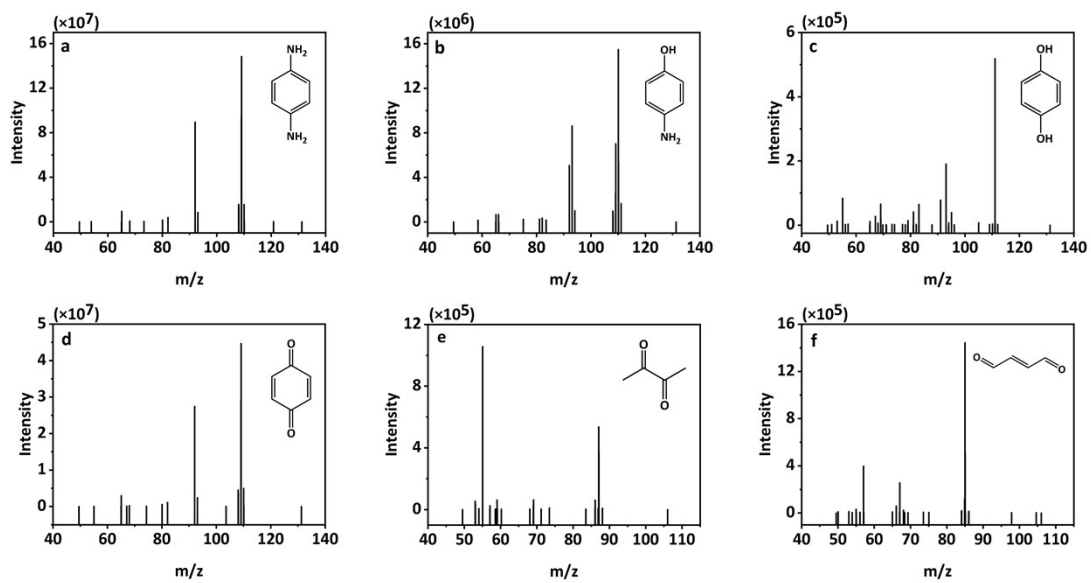

**Fig. S3** Secondary mass spectrometry of *p*-phenylenediamine (a), *p*-aminophenol (b), hydroquinone (c), *p*-benzoquinone (d), 2,3-butanedione (e) and 1,4-butylene ketone (f).
